# Supplementary material for: Diabetic impairments in NO-mediated endothelial progenitor cell mobilization and homing are reversed by hyperoxia and SDF-1α
Source: JCI journal article supplement (doi:10.1172/jci29710), 2007-05-01
Supplement: sd1 [file 1]

Supplemental Figure 1

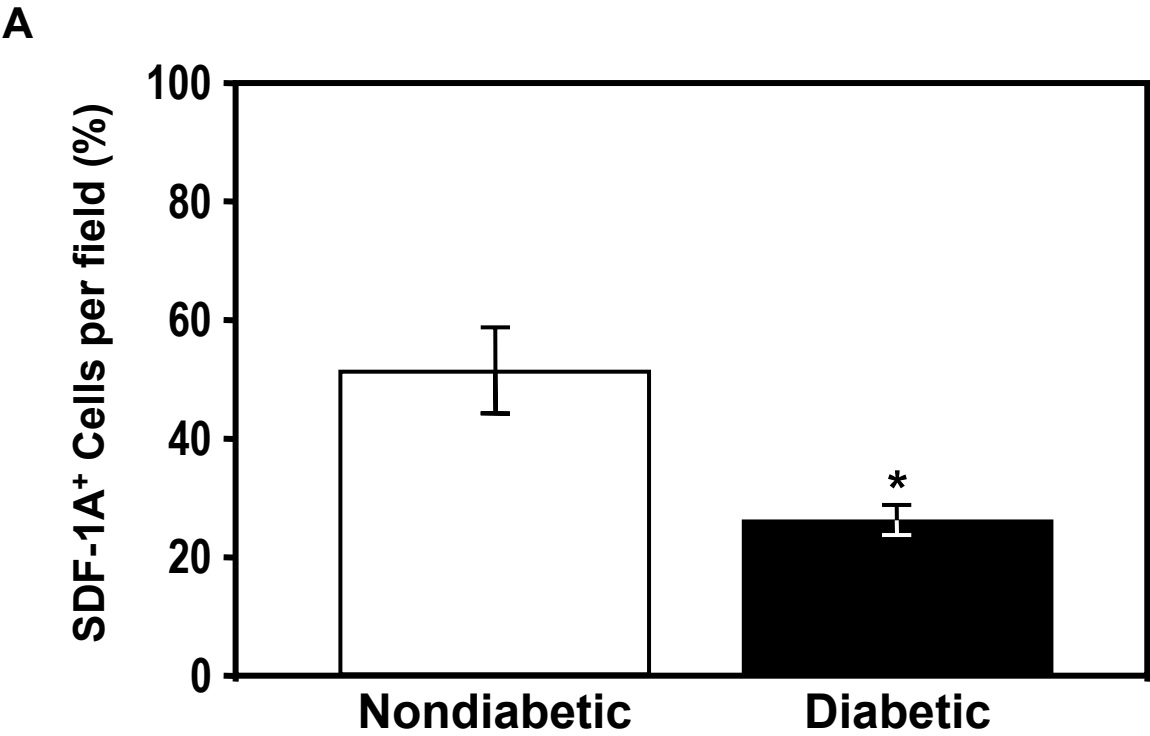

**Nondiabetic**

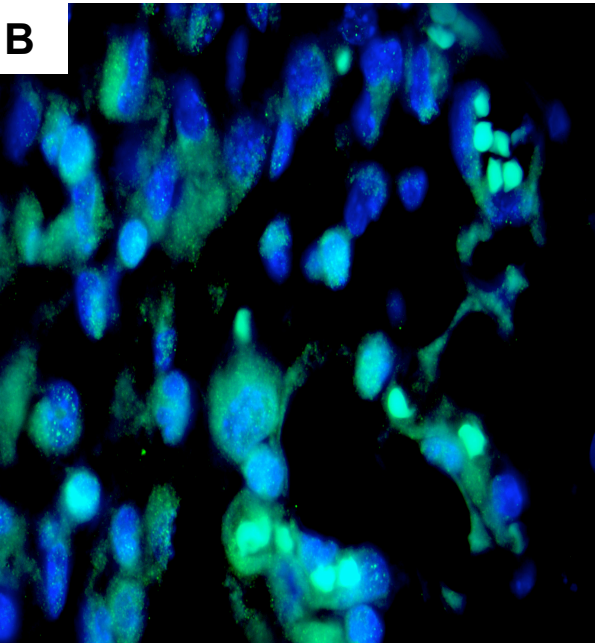

**Diabetic**

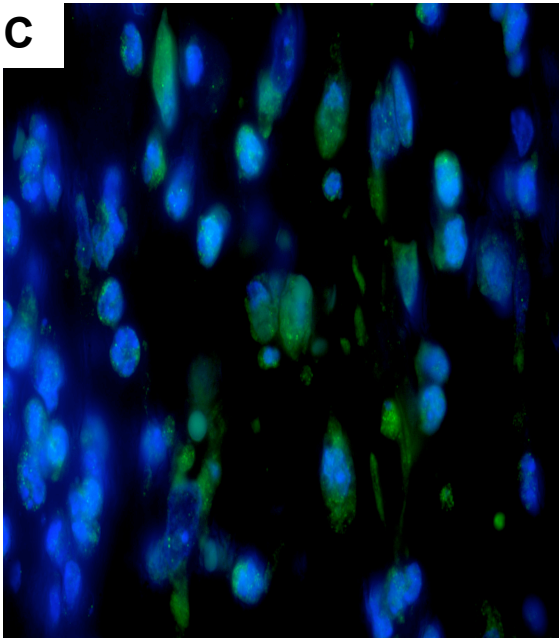

# Supplemental Figure 2

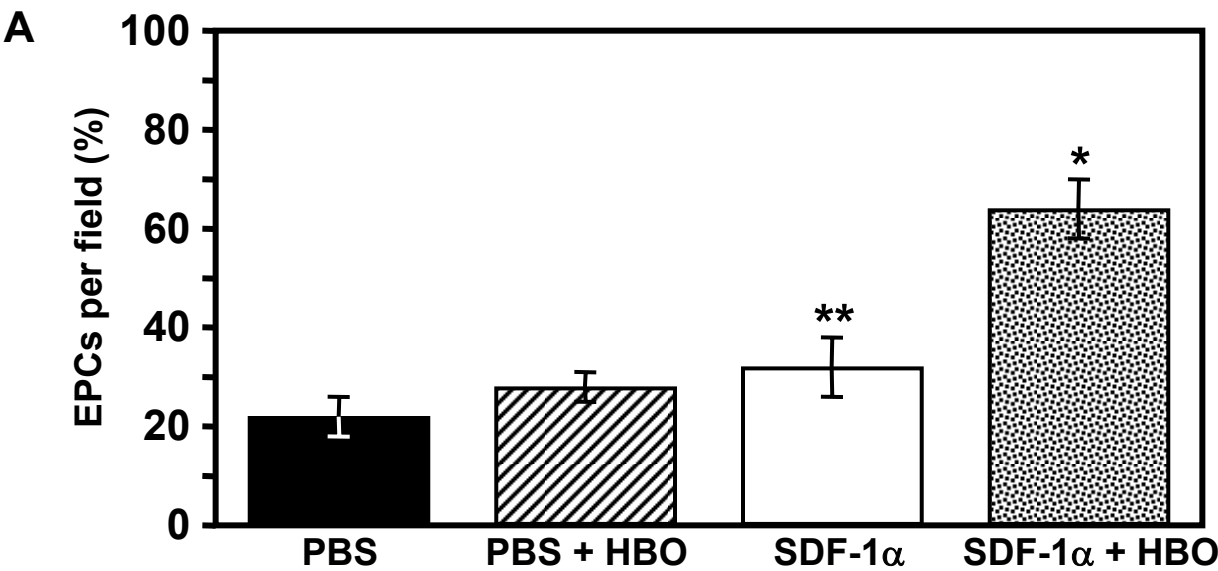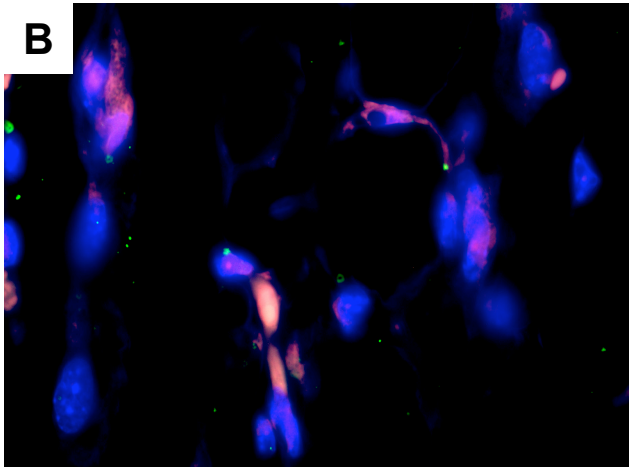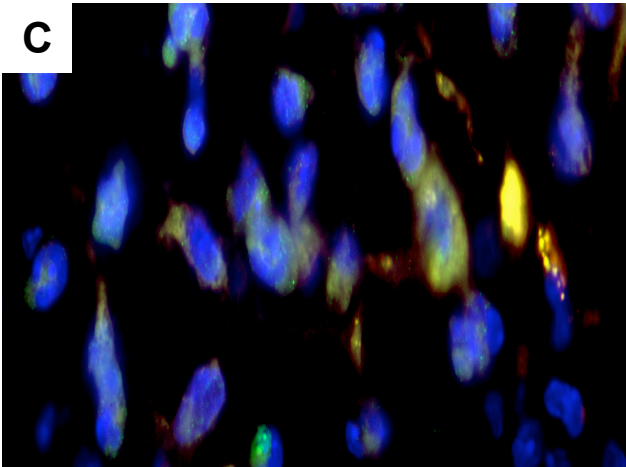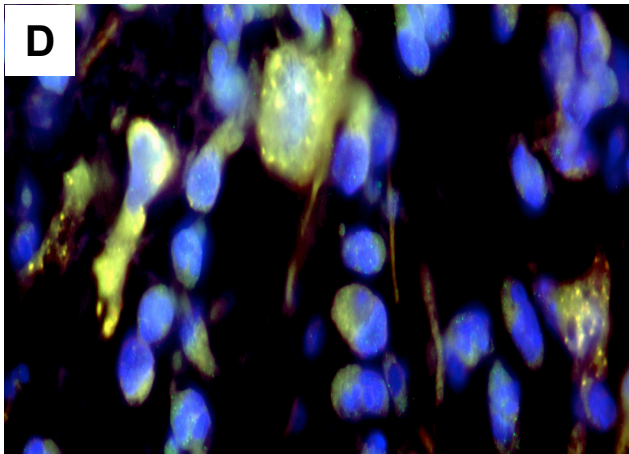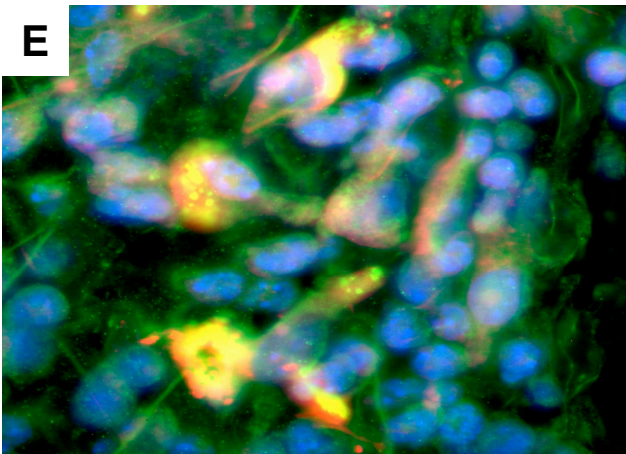

## Supplemental Figure 3

**A**

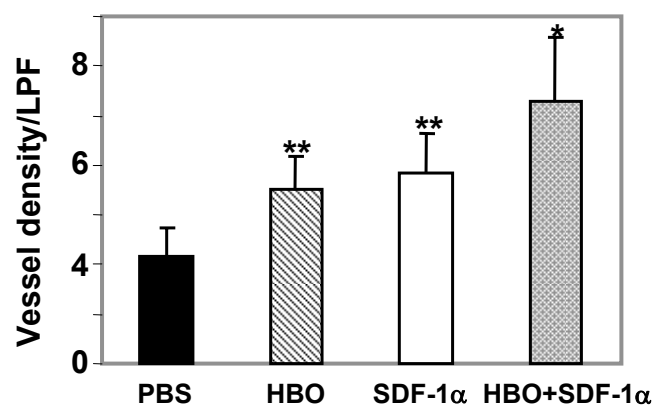

**B**

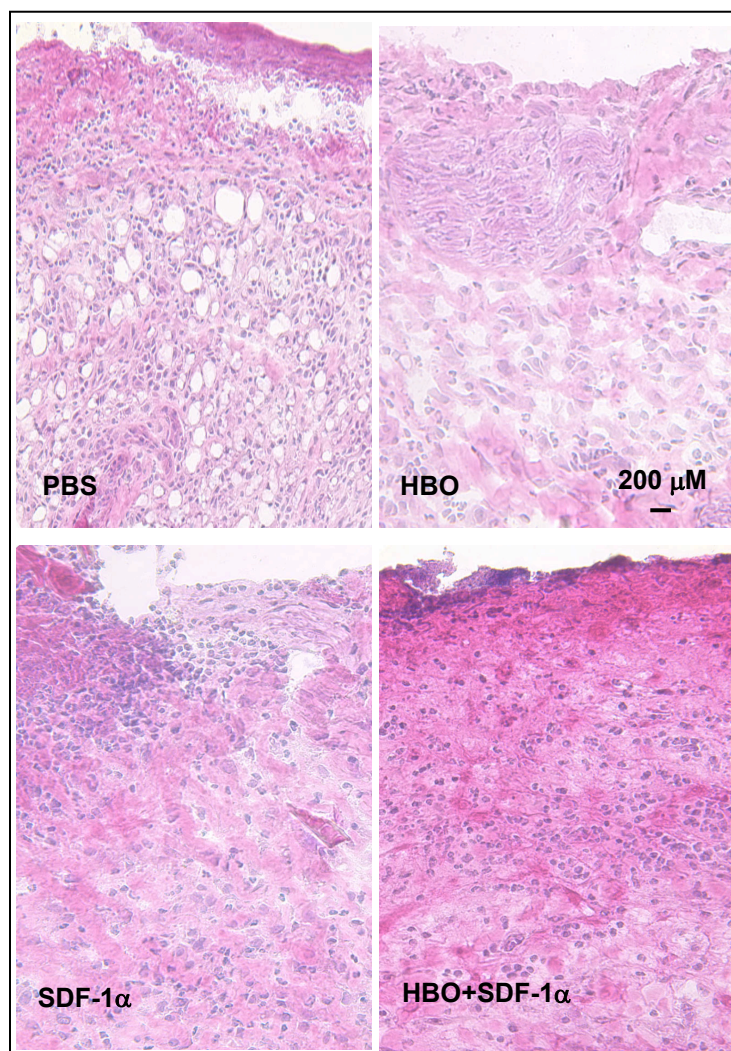

### **Supplemental Figure 1.**

Decreased numbers of SDF-1 $\alpha$ <sup>+</sup> expressing cells in peripheral wounds of diabetic mice.

(A) Wounds were examined for SDF-1 $\alpha$ <sup>+</sup> expression in diabetic (n=5) and nondiabetic (n=5) mice by fluorescence immunostaining 24 h post-wounding and 10 d after STZ treatment. For each animal, the percentage of cells expressing SDF-1 $\alpha$  was quantified relative to the total wound cellularity in 5 serial cross-sections per wound, counting 10 random high power fields (HPF) at 100X magnification. Wounds harvested from diabetic mice demonstrated significantly fewer cells expressing SDF-1 $\alpha$  as compared to nondiabetic controls. \* $P < .005$ . (B-C) Representative SDF-1 $\alpha$ <sup>+</sup> staining of wound sections of nondiabetic (B) and diabetic (C) animals are shown. Sections (5 $\mu$ m thick) were stained for cells with anti-SDF-1 $\alpha$  antibody and Alexa 488-conjugated secondary antibody (green). Nuclei were counterstained with Hoescht dye (blue).

### **Supplemental Figure 2.**

Impaired EPC homing to wound tissue in diabetes is reversed by cutaneous administration of SDF-1 $\alpha$ . 4 groups (n=5 per group) of wounded diabetic mice were treated with daily wound injections of either SDF-1 $\alpha$  or PBS  $\pm$  daily HBO. After 3 days of treatment, wounds were harvested and analyzed by fluorescent immunostaining of tissue sections (5  $\mu$ m thick) with anti-CXCR4 antibody with Alexa 488-conjugated secondary antibody (green) and anti-VEGFR2 antibody with PE-conjugated secondary antibody (red). Nuclei were counterstained with Hoescht dye (blue). EPC were identified as cells double-labeled with CXCR4 and VEGFR2. (A) Quantitation of EPCs in PBS controls, PBS + HBO, SDF-1 $\alpha$ , and SDF-1 $\alpha$  + HBO treated diabetic mice are

shown. For each animal, 10 random high-power fields (100X magnification) from 5 serial cross-sections were analyzed and the percentage of cells expressing both CXCR4 and VEGFR2 was quantified relative to the total wound cellularity. All data are expressed as mean  $\pm$  SEM based on three experiments. SDF-1 $\alpha$  + HBO treated mice had a significant rise in the percentage of endothelial progenitor cells compared to PBS controls, PBS + HBO, and SDF-1 $\alpha$  treated animals (\* $P$ <.05). SDF-1 $\alpha$  treated animals had a significant increase in tissue EPC when compared to PBS controls (\*\* $P$ <.05). HBO did not significantly change the percentage of EPC within wounds. (B-E) Representative wound sections of PBS controls (B), PBS + HBO (C), SDF-1 $\alpha$  (D) and SDF-1 $\alpha$  + HBO (E) are shown.

### **Supplemental Figure 3.**

(A) Blood vessel density in healing wounds. Vessels were stained with anti-VEGFR2-FITC in wounded tissue sections. For each sample, 10 random low-power fields (LPF, X20) from 5 serial cross-sections were analyzed and the number of vessels was counted.

(B) H&E staining show overall cellularity and stromagenesis in healing wounds at d 6. SDF1 $\alpha$ +HBO treatment strongly enhances stromagenesis compared to other groups.
